# Supplementary material
Source: publisher figshare collection journal article supplement (https://gsajournals.figshare.com/ndownloader/files/25011734)
Supplement: Supplementary file 1 [file 25011734]

## Sheet: Table S4
Table S4. Gene expression changes in injured +/Reldel and Reldel/Reldel flies relative to injured +/+ flies.
UPREGULATED in injured +/Reldel							DOWNREGULATED in injured +/Reldel							UPREGULATED in injured Reldel/Reldel							DOWNREGULATED in injured Reldel/Reldel
Ensembl	Symbol	logFC	PValue	FDR			Ensembl	Symbol	logFC	PValue	FDR			Ensembl	Symbol	logFC	PValue	FDR			Ensembl	Symbol	logFC	PValue	FDR
FBgn0037975	CG3397	10.3422	7.32815e-53	3.29474e-49			FBgn0029733	CG6927	3.39091	9.20911e-06	0.00230023			FBgn0037975	CG3397	11.6488	7.5219e-99	2.5409e-95			FBgn0014018	Rel	13.7464	7.4909e-189	1.0122e-184
FBgn0052475	mthl8	7.1515	3.34126e-28	1.12667e-24			FBgn0014931	CG2678	2.45949	3.09266e-05	0.00632028			FBgn0052475	mthl8	7.99618	1.7695e-49	1.8392e-46			FBgn0053105	p24-2	12.497	1.6182e-93	4.373e-90
FBgn0265421	lncRNA:CR44333	6.92969	6.12875e-12	6.35881e-09			FBgn0010385	Def	1.73587	7.36313e-07	0.00030846			FBgn0265421	lncRNA:CR44333	7.60455	1.1812e-16	2.7052e-14			FBgn0263763	CG43680	10.8777	5.7052e-79	1.1013e-75
FBgn0264428	lncRNA:CR43846	6.31866	2.28819e-08	1.23452e-05			FBgn0051683	CG31683	1.66146	4.67787e-05	0.00914421			FBgn0264428	lncRNA:CR43846	6.99583	1.2209e-11	1.6834e-09			FBgn0052581	CG32581	9.53412	3.3509e-29	1.8866e-26
FBgn0052203	Spn75F	4.99308	4.71581e-104	6.36069e-100			FBgn0286030	lncRNA:CR46350	1.5903	0.000114156	0.018551			FBgn0265885	lncRNA:CR44674	6.50261	2.7185e-10	3.2796e-08			FBgn0260463	Unc-115b	8.46127	4.6097e-93	1.0381e-89
FBgn0263025	HSPBAP1	4.43284	2.11071e-74	1.42347e-70			FBgn0002565	Lsp2	1.58765	1.62626e-05	0.00378188			FBgn0052203	Spn75F	5.65724	9.731e-64	1.461e-60			FBgn0286030	lncRNA:CR46350	8.28814	1.8758e-21	6.1818e-19
FBgn0266927	lncRNA:CR45378	4.32334	3.58532e-10	3.02242e-07			FBgn0262363	CG43061	1.58488	7.45216e-05	0.0132256			FBgn0263025	HSPBAP1	5.48352	4.5855e-108	2.0653e-104			FBgn0263493	CR43482	7.92194	1.6401e-17	3.9573e-15
FBgn0000473	Cyp6a2	4.22083	1.63783e-14	2.45456e-11			FBgn0267779	lncRNA:CR46110	1.51351	0.000373521	0.0498817			FBgn0000473	Cyp6a2	5.30043	1.3534e-12	2.0095e-10			FBgn0026314	Ugt35B1	7.68875	1.4743e-185	9.9605e-182
FBgn0265741	lncRNA:CR44548	3.94158	5.81797e-06	0.00165276			FBgn0003312	sad	1.50916	7.79974e-10	5.26014e-07			FBgn0266927	lncRNA:CR45378	5.05497	6.6709e-13	1.0731e-10			FBgn0264601	lncRNA:CR43950	7.45199	1.2694e-16	2.8587e-14
FBgn0267636	asRNA:CR45974	3.58273	5.35325e-13	7.22046e-10			FBgn0263763	CG43680	1.48168	1.79553e-12	2.01818e-09			FBgn0267636	asRNA:CR45974	4.84246	3.0359e-28	1.5193e-25			FBgn0265455	CG44355	7.41944	2.7892e-16	6.0787e-14
FBgn0265738	lncRNA:CR44545	3.458	4.24705e-08	2.20324e-05			FBgn0260463	Unc-115b	1.46146	6.44161e-09	3.94929e-06			FBgn0039444	TwdlD	4.51739	2.7147e-12	3.9871e-10			FBgn0013277	Hsp70Ba	7.13042	6.8715e-10	7.8685e-08
FBgn0037997	CG14742	3.11974	2.85248e-05	0.00591911			FBgn0026314	Ugt35B1	1.37334	8.4896e-16	1.63582e-12			FBgn0265738	lncRNA:CR44545	4.15168	8.2709e-13	1.2995e-10			FBgn0035845	CG13675	7.12252	8.2681e-63	1.1172e-59
FBgn0040251	Ugt302K1	2.95762	8.89132e-13	1.09024e-09			FBgn0264383	lncRNA:CR43835	1.32601	4.95506e-05	0.00954769			FBgn0002869	MtnB	4.10648	2.9411e-24	1.2419e-21			FBgn0038530	AttD	7.11896	3.1114e-26	1.4014e-23
FBgn0267711	asRNA:CR46044	2.80012	9.69161e-07	0.000384472			FBgn0028855	CG15282	1.30283	0.00026074	0.0374193			FBgn0259230	lectin-22C	3.76491	1.1416e-05	0.00061949			FBgn0010385	Def	7.01089	1.8414e-68	3.1101e-65
FBgn0002869	MtnB	2.73564	5.83973e-09	3.75078e-06			FBgn0267302	asRNA:CR45738	1.23923	0.000133119	0.0211236			FBgn0053926	CG33926	3.74363	1.1601e-28	6.2703e-26			FBgn0085465	CG34436	6.97666	2.8094e-11	3.6855e-09
FBgn0267193	lncRNA:CR45633	2.70065	1.53024e-06	0.000573332			FBgn0014018	Rel	1.2076	5.6383e-10	4.0026e-07			FBgn0262998	lncRNA:CR43306	3.63546	1.5494e-29	9.516e-27			FBgn0264600	lncRNA:CR43949	6.64554	1.2358e-21	4.1745e-19
FBgn0262998	lncRNA:CR43306	2.68699	2.98193e-17	6.70338e-14			FBgn0263415	lncRNA:CR43461	1.18892	5.03201e-05	0.0095594			FBgn0040251	Ugt302K1	3.63333	7.9373e-23	2.9791e-20			FBgn0004240	DptA	6.57489	1.1211e-54	1.2624e-51
FBgn0267692	lncRNA:CR46028	2.51632	1.61403e-07	7.50691e-05			FBgn0264569	lncRNA:CR43941	1.17367	2.04146e-05	0.00458921			FBgn0267692	lncRNA:CR46028	3.5603	4.8077e-14	8.7753e-12			FBgn0058005	CR40005	6.53476	3.9483e-08	3.3805e-06
FBgn0267686	lncRNA:CR46022	2.38041	4.9176e-08	2.45661e-05			FBgn0037930	CG14715	1.04229	1.3869e-08	7.7944e-06			FBgn0266202	asRNA:CR44897	3.29058	0.00039193	0.013108			FBgn0265740	lncRNA:CR44547	5.25912	1.3344e-13	2.3117e-11
FBgn0037974	CG12224	2.29303	4.32413e-10	3.24022e-07			FBgn0267539	CR45879	1.0329	8.68565e-05	0.0147048			FBgn0267193	lncRNA:CR45633	3.13464	1.6097e-10	1.9954e-08			FBgn0262363	CG43061	5.24339	8.2003e-22	2.8411e-19
FBgn0038285	CG6974	2.26824	5.8283e-05	0.0107688										FBgn0267686	lncRNA:CR46022	2.90961	1.3461e-12	2.0095e-10			FBgn0266405	lncRNA:CR45045	5.1939	3.4785e-21	1.1191e-18
FBgn0010359	gammaTry	2.25104	1.74774e-05	0.00399552										FBgn0037974	CG12224	2.79775	9.0324e-20	2.5967e-17			FBgn0000279	CecC	5.04141	2.2685e-20	6.8115e-18
FBgn0266701	lncRNA:CR45191	1.97702	5.70503e-08	2.7482e-05										FBgn0266701	lncRNA:CR45191	2.74544	1.0857e-13	1.9052e-11			FBgn0051683	CG31683	5.0167	2.0796e-32	1.4789e-29
FBgn0004426	LysC	1.95653	3.90594e-07	0.000175611										FBgn0002562	Lsp1alpha	2.67723	1.2959e-05	0.00068667			FBgn0033327	PGRP-SC1b	5.00318	2.6034e-15	5.2504e-13
FBgn0035663	CG6462	1.93477	0.000331724	0.0451948										FBgn0038285	CG6974	2.65735	3.0181e-06	0.00018452			FBgn0034407	DptB	4.9966	6.8434e-61	8.4062e-58
FBgn0283501	lncRNA:CR46115	1.85461	7.59172e-05	0.0132983										FBgn0265805	lncRNA:CR44594	2.51894	2.1494e-08	1.9898e-06			FBgn0264787	lncRNA:CR44017	4.98239	6.5462e-22	2.3277e-19
FBgn0266099	CG44836	1.69657	9.41043e-11	8.46186e-08										FBgn0267711	asRNA:CR46044	2.40842	0.00011309	0.0046808			FBgn0264383	lncRNA:CR43835	4.94902	1.2042e-36	9.5709e-34
FBgn0053926	CG33926	1.67527	8.72172e-05	0.0147048										FBgn0266099	CG44836	2.38404	5.6857e-19	1.6005e-16			FBgn0041579	AttC	4.80794	2.1862e-45	2.11e-42
FBgn0037683	CG18473	1.65119	3.14854e-23	8.4935e-20										FBgn0002945	nkd	2.37661	4.626e-18	1.1794e-15			FBgn0267779	lncRNA:CR46110	4.47273	4.8129e-13	7.9308e-11
FBgn0052751	CG32751	1.62598	0.000213466	0.0323509										FBgn0037562	Nazo	2.32512	1.6824e-11	2.2962e-09			FBgn0003312	sad	4.43271	1.8116e-40	1.5299e-37
FBgn0036831	CG6839	1.57373	1.06769e-06	0.000411459										FBgn0037683	CG18473	2.30763	8.7823e-33	6.5926e-30			FBgn0264569	lncRNA:CR43941	4.41672	1.3962e-23	5.5487e-21
FBgn0037562	Nazo	1.57115	3.95613e-06	0.00130147										FBgn0031490	CG17264	2.29563	4.8461e-32	3.274e-29			FBgn0000278	CecB	4.3478	9.8219e-16	2.0418e-13
FBgn0265805	lncRNA:CR44594	1.50666	0.000228742	0.0342808										FBgn0266948	lncRNA:CR45399	2.2795	0.00015684	0.0060604			FBgn0267950	lncRNA:CR46230	4.24376	3.3744e-08	2.9801e-06
FBgn0267545	asRNA:CR45885	1.4916	5.88171e-06	0.00165276										FBgn0266024	lncRNA:CR44789	2.22656	0.00027834	0.0098973			FBgn0034317	CG14499	4.23621	1.3573e-15	2.7787e-13
FBgn0263777	CG43694	1.4909	3.87473e-05	0.00780036										FBgn0051104	CG31104	2.22571	2.9864e-10	3.571e-08			FBgn0052011	CR32011	3.72141	2.3562e-06	0.00014604
FBgn0053468	CG33468	1.34156	7.61793e-06	0.00201472										FBgn0053468	CG33468	2.21117	9.5065e-15	1.889e-12			FBgn0041581	AttB	3.64677	7.4913e-21	2.354e-18
FBgn0039806	CG15545	1.2798	4.25673e-05	0.00844335										FBgn0267545	asRNA:CR45885	2.19558	1.9707e-11	2.6628e-09			FBgn0267868	lncRNA:CR46156	3.63906	3.7052e-08	3.2093e-06
FBgn0039316	CG11893	1.27744	5.92859e-05	0.0108061										FBgn0036839	SmydA-2	2.1574	9.6876e-19	2.5666e-16			FBgn0028855	CG15282	3.54105	5.8222e-18	1.4508e-15
FBgn0002945	nkd	1.27356	1.36065e-14	2.29406e-11										FBgn0038851	dmrt93B	2.11543	6.6528e-05	0.0029865			FBgn0010040	GstD4	3.52451	1.3139e-10	1.6592e-08
FBgn0040255	Ugt35E2	1.23677	0.00018444	0.0285946										FBgn0263777	CG43694	2.08121	6.7323e-08	5.5234e-06			FBgn0034489	ppk6	3.51353	2.9985e-20	8.8077e-18
FBgn0259145	CG42260	1.20043	5.50958e-06	0.0016155										FBgn0040637	CG11458	2.03231	6.7564e-05	0.0030229			FBgn0262580	CG43120	3.49156	4.5029e-24	1.8437e-21
FBgn0036839	SmydA-2	1.19074	5.06015e-06	0.001536										FBgn0267615	lncRNA:CR45953	2.01424	5.1579e-06	0.00029531			FBgn0036440	CG17177	3.43815	5.5522e-32	3.5725e-29
FBgn0262969	lncRNA:CR43280	1.18339	0.000312377	0.0429932										FBgn0032839	AANATL3	2.00512	0.00049007	0.015691			FBgn0265833	CG44622	3.36057	4.5671e-06	0.000266
FBgn0039703	CG7829	1.09621	4.45545e-06	0.00139756										FBgn0259145	CG42260	2.00037	3.7697e-10	4.3871e-08			FBgn0262003	CG42821	3.31882	6.5412e-19	1.8038e-16
FBgn0040827	CG13315	1.07857	7.0302e-09	4.12275e-06										FBgn0262010	CG42828	2.00026	7.6724e-10	8.5677e-08			FBgn0265165	lncRNA:CR44234	3.25813	2.5408e-09	2.6614e-07
FBgn0039309	CG11891	1.06255	3.54776e-06	0.00119631										FBgn0262983	CG43291	1.99698	2.0283e-06	0.00012867			FBgn0265076	lncRNA:CR44187	3.22334	1.8772e-06	0.00012021
FBgn0262010	CG42828	1.05837	4.69628e-07	0.000204334										FBgn0026755	Ugt37B1	1.98659	7.059e-06	0.00040076			FBgn0038160	CG9759	3.18504	3.2503e-06	0.00019476
FBgn0030773	CG9676	1.0544	5.12456e-06	0.001536										FBgn0040255	Ugt35E2	1.97499	3.9529e-08	3.3805e-06			FBgn0004649	yl	3.15398	0.0013757	0.036446
FBgn0263403	CG43449	1.04922	8.44538e-11	8.13652e-08										FBgn0263401	CG43447	1.96727	1.7352e-06	0.00011165			FBgn0267553	lncRNA:CR45893	3.09791	1.0912e-05	0.00059453
FBgn0004644	hh	1.02176	0.000358023	0.0482902										FBgn0039342	CG5107	1.96706	0.00081041	0.0236			FBgn0043578	PGRP-SB1	3.09772	2.0406e-29	1.1988e-26
FBgn0036730	qjt	1.01675	4.20743e-10	3.24022e-07										FBgn0052368	CG32368	1.95489	6.7975e-17	1.5836e-14			FBgn0051226	CG31226	3.0916	2.9177e-45	2.6283e-42
FBgn0031490	CG17264	1.00161	2.25564e-06	0.000800633										FBgn0267531	asRNA:CR45871	1.94895	1.1276e-07	8.91e-06			FBgn0000277	CecA2	3.08717	4.6586e-12	6.6964e-10
														FBgn0262969	lncRNA:CR43280	1.91437	3.425e-07	2.4881e-05			FBgn0264723	lncRNA:CR43991	2.95486	4.9933e-06	0.0002871
														FBgn0036831	CG6839	1.90547	4.1943e-05	0.0019956			FBgn0036833	CG3819	2.95025	2.2328e-14	4.3099e-12
														FBgn0259697	nvd	1.88038	7.9153e-06	0.00044378			FBgn0002564	Lsp1gamma	2.8664	6.6288e-12	9.4282e-10
														FBgn0267786	lncRNA:CR46117	1.8611	0.00023882	0.008698			FBgn0263389	CR43441	2.84273	3.7098e-22	1.3548e-19
														FBgn0266784	lncRNA:CR45249	1.85539	3.0555e-08	2.7161e-06			FBgn0027500	spd-2	2.83281	1.6396e-27	7.9121e-25
														FBgn0262903	lncRNA:CR43258	1.81682	0.00024321	0.0088339			FBgn0261434	hkb	2.82295	4.8709e-14	8.7753e-12
														FBgn0040827	CG13315	1.79338	8.2313e-13	1.2995e-10			FBgn0032281	CG17107	2.8039	3.2689e-06	0.00019476
														FBgn0003358	Jon99Ci	1.77399	0.00022949	0.0084491			FBgn0033593	Listericin	2.79494	1.2535e-28	6.5142e-26
														FBgn0054040	CG34040	1.77023	0.00066221	0.020153			FBgn0037930	CG14715	2.76333	1.3e-26	6.0573e-24
														FBgn0036242	CG6793	1.75642	2.0325e-05	0.0010442			FBgn0264568	lncRNA:CR43940	2.74004	7.2208e-16	1.5245e-13
														FBgn0283501	lncRNA:CR46115	1.75486	7.6059e-05	0.0033259			FBgn0266815	lncRNA:CR45277	2.72091	5.2405e-05	0.0024333
														FBgn0263403	CG43449	1.74946	1.0326e-10	1.3288e-08			FBgn0010043	GstD7	2.71597	1.3586e-09	1.4569e-07
														FBgn0040257	Ugt302E1	1.74821	3.4943e-07	2.524e-05			FBgn0264697	lncRNA:CR43966	2.68564	4.5305e-07	3.2219e-05
														FBgn0267165	lncRNA:CR45605	1.74771	0.00022078	0.008218			FBgn0039811	CG15550	2.63343	9.2449e-06	0.00050987
														FBgn0266407	lncRNA:CR45047	1.73212	0.0019014	0.046911			FBgn0262007	CG42825	2.63155	1.237e-08	1.1854e-06
														FBgn0036730	qjt	1.73151	7.6893e-19	2.078e-16			FBgn0263844	lncRNA:CR43705	2.62391	6.2542e-05	0.0028358
														FBgn0000564	Eh	1.70965	0.00028394	0.010033			FBgn0035886	Jon66Ci	2.61854	0.00032057	0.010938
														FBgn0267296	lncRNA:CR45732	1.6947	0.0010746	0.030061			FBgn0029639	CG14419	2.60312	7.1014e-12	9.9952e-10
														FBgn0051446	CG31446	1.6723	0.0014781	0.03878			FBgn0263415	lncRNA:CR43461	2.58624	3.9339e-14	7.2814e-12
														FBgn0266408	lncRNA:CR45048	1.66457	3.8798e-07	2.7738e-05			FBgn0030981	CG14191	2.56987	6.9565e-08	5.6625e-06
														FBgn0036563	CG13075	1.66267	1.0572e-08	1.0204e-06			FBgn0267302	asRNA:CR45738	2.55988	4.1672e-11	5.4141e-09
														FBgn0054026	CG34026	1.66046	4.6295e-06	0.00026847			FBgn0036806	Cyp12c1	2.55896	6.0594e-17	1.4364e-14
														FBgn0035604	Ir64a	1.65878	3.8094e-06	0.00022379			FBgn0010041	GstD5	2.53411	2.0592e-07	1.5458e-05
														FBgn0052302	CG32302	1.63355	3.2373e-05	0.0015849			FBgn0053532	lectin-37Da	2.52141	3.1339e-07	2.314e-05
														FBgn0051300	CG31300	1.62821	8.4361e-12	1.1751e-09			FBgn0038705	CG11626	2.4993	1.1679e-12	1.7932e-10
														FBgn0039309	CG11891	1.60609	1.2306e-12	1.8683e-10			FBgn0267539	CR45879	2.48526	2.5214e-13	4.3125e-11
														FBgn0035315	CG8960	1.60211	8.5239e-06	0.00047593			FBgn0010038	GstD2	2.48284	1.3835e-14	2.7093e-12
														FBgn0040832	CG8012	1.59354	9.4793e-08	7.624e-06			FBgn0260780	wisp	2.45856	0.0019919	0.048582
														FBgn0267472	asRNA:CR45822	1.58851	0.0013783	0.036446			FBgn0267620	lncRNA:CR45958	2.40671	1.2509e-06	8.2851e-05
														FBgn0266596	asRNA:CR45121	1.56176	1.622e-06	0.00010486			FBgn0085194	CG34165	2.33234	6.0252e-08	5.0009e-06
														FBgn0036044	Zasp67	1.55959	0.00016163	0.00619			FBgn0026144	CBP	2.33213	1.1061e-07	8.7919e-06
														FBgn0086408	stl	1.55259	0.00010535	0.0044483			FBgn0040318	HGTX	2.30502	3.3902e-18	8.8094e-16
														FBgn0263344	asRNA:CR43425	1.53311	0.00010609	0.0044518			FBgn0052251	Claspin	2.29466	0.0012103	0.033375
														FBgn0034183	SmydA-6	1.52832	0.0015795	0.040885			FBgn0052205	hpRNA:CR32205	2.22888	6.8119e-16	1.461e-13
														FBgn0053346	CG33346	1.52051	0.00041752	0.01376			FBgn0267665	lncRNA:CR46003	2.22642	2.3755e-10	2.8917e-08
														FBgn0264915	asRNA:CR44106	1.49972	0.00062869	0.019306			FBgn0265745	lncRNA:CR44552	2.21883	2.7581e-08	2.5181e-06
														FBgn0035476	CG12766	1.49483	9.0422e-06	0.00050073			FBgn0262146	MtnE	2.14662	4.0643e-09	4.0679e-07
														FBgn0263410	lncRNA:CR43456	1.49067	0.00011203	0.0046576			FBgn0264843	lncRNA:CR44051	2.1417	7.3944e-05	0.0032651
														FBgn0032638	SPH93	1.47736	1.8796e-07	1.4268e-05			FBgn0005390	fs(1)M3	2.13441	0.0010964	0.030608
														FBgn0266227	lncRNA:CR44922	1.47616	1.8711e-10	2.2983e-08			FBgn0265158	CG44227	2.09629	3.7271e-10	4.3871e-08
														FBgn0053265	Muc68E	1.47473	5.4834e-05	0.0025201			FBgn0264985	lncRNA:CR44136	2.07145	9.4222e-09	9.1591e-07
														FBgn0263494	CR43483	1.47146	0.00049969	0.015824			FBgn0266239	lncRNA:CR44934	2.0203	2.15e-08	1.9898e-06
														FBgn0039161	CG13606	1.4706	0.00038117	0.01278			FBgn0028532	CG7968	2.01163	0.00016822	0.0064208
														FBgn0039703	CG7829	1.45372	7.6842e-08	6.2173e-06			FBgn0010039	GstD3	1.96925	3.6519e-25	1.5918e-22
														FBgn0085420	DIP-delta	1.43924	3.5333e-13	5.9677e-11			FBgn0267761	asRNA:CR46092	1.96177	4.1318e-05	0.0019727
														FBgn0038790	MtnC	1.43752	1.1572e-07	9.0907e-06			FBgn0003023	otu	1.95811	0.00046989	0.015189
														FBgn0050360	Mal-A6	1.43006	0.0018318	0.045666			FBgn0266951	lncRNA:CR45402	1.9455	0.00022562	0.0083383
														FBgn0267681	lncRNA:CR46017	1.36508	1.7111e-07	1.3212e-05			FBgn0266231	lncRNA:CR44926	1.93836	0.0004763	0.01536
														FBgn0015575	alpha-Est7	1.35261	2.712e-11	3.5926e-09			FBgn0036402	CG6650	1.93373	1.6596e-23	6.4072e-21
														FBgn0039806	CG15545	1.35242	3.8216e-05	0.0018376			FBgn0033978	Cyp6a23	1.92173	6.1897e-13	1.0077e-10
														FBgn0265378	lncRNA:CR44319	1.35017	0.00049464	0.0158			FBgn0264514	lncRNA:CR43913	1.91457	1.2283e-07	9.5381e-06
														FBgn0037488	CG14607	1.34012	0.00055736	0.017414			FBgn0267621	lncRNA:CR45959	1.90533	2.8249e-08	2.5446e-06
														FBgn0000477	DNaseII	1.33956	8.5612e-10	9.4819e-08			FBgn0036780	CG7330	1.90353	2.5152e-05	0.0012676
														FBgn0035193	CG9192	1.33207	1.0625e-07	8.4953e-06			FBgn0263767	lncRNA:CR43684	1.85421	1.1912e-20	3.6582e-18
														FBgn0038257	smp-30	1.32568	3.2719e-06	0.00019476			FBgn0267536	lncRNA:CR45876	1.83887	0.00052365	0.016455
														FBgn0053696	CNMaR	1.31464	0.00011563	0.004749			FBgn0050428	CG30428	1.82346	9.504e-14	1.6897e-11
														FBgn0013279	Hsp70Bc	1.29516	8.779e-06	0.00048815			FBgn0036969	Spn77Bb	1.82087	2.3225e-16	5.1446e-14
														FBgn0267619	lncRNA:CR45957	1.28861	0.0007177	0.02136			FBgn0263985	CR43734	1.79599	0.00027767	0.0098973
														FBgn0265728	lncRNA:CR44535	1.279	3.2252e-06	0.00019455			FBgn0263587	lncRNA:CR43612	1.78731	1.0986e-10	1.4004e-08
														FBgn0265653	lncRNA:CR44460	1.27664	0.0014988	0.039173			FBgn0034475	Obp56h	1.77869	6.2307e-07	4.3174e-05
														FBgn0265511	lncRNA:CR44373	1.26869	0.00070049	0.020896			FBgn0023479	teq	1.76414	5.9053e-18	1.4508e-15
														FBgn0025454	Cyp6g1	1.2534	1.519e-06	9.8677e-05			FBgn0034468	Obp56a	1.75458	1.2884e-08	1.226e-06
														FBgn0036350	CG14111	1.25209	5.2833e-05	0.0024364			FBgn0265549	lncRNA:CR44399	1.75378	0.00062187	0.019184
														FBgn0267730	lncRNA:CR46061	1.24777	0.00069928	0.020896			FBgn0036320	CG10943	1.75265	0.00040036	0.013259
														FBgn0052301	CG32301	1.24728	6.3132e-07	4.3301e-05			FBgn0037186	CG11241	1.74075	2.6625e-07	1.9767e-05
														FBgn0038731	CG11659	1.23972	0.00035995	0.012159			FBgn0266564	lncRNA:CR45103	1.73902	1.1404e-09	1.2427e-07
														FBgn0036332	Cul6	1.23452	3.4802e-08	3.0535e-06			FBgn0267136	lncRNA:CR45576	1.71873	0.0002191	0.0081781
														FBgn0037973	CG18547	1.22476	8.5612e-05	0.0036696			FBgn0029707	CG12688	1.69729	0.00079669	0.02325
														FBgn0250815	Jon65Aiv	1.22022	0.0020489	0.049883			FBgn0083950	side-VI	1.69104	8.7182e-10	9.5772e-08
														FBgn0032835	CG16772	1.21384	0.00045999	0.014977			FBgn0261401	Ir75c	1.68492	0.00074539	0.021991
														FBgn0051077	CG31077	1.20847	2.733e-09	2.8407e-07			FBgn0053318	CR33318	1.66101	8.8403e-09	8.6558e-07
														FBgn0032381	Mal-B1	1.20393	0.0016979	0.043125			FBgn0002565	Lsp2	1.65546	0.00081985	0.023823
														FBgn0085261	CG34232	1.19966	1.4267e-06	9.324e-05			FBgn0036331	CG14117	1.64784	3.469e-09	3.498e-07
														FBgn0085353	CG34324	1.19497	0.00016171	0.00619			FBgn0036363	CG10140	1.63744	0.00066001	0.020131
														FBgn0040507	ACXD	1.1776	4.4999e-05	0.0021112			FBgn0039759	CG9733	1.63168	1.4284e-06	9.324e-05
														FBgn0031910	CG15818	1.16319	2.801e-08	2.5401e-06			FBgn0085256	CG34227	1.61799	2.9623e-05	0.0014645
														FBgn0038301	CG6654	1.15364	3.7519e-10	4.3871e-08			FBgn0034647	pirk	1.60869	2.955e-06	0.00018149
														FBgn0040817	CG14132	1.15186	0.0017492	0.043932			FBgn0010042	GstD6	1.59767	0.0013272	0.03558
														FBgn0039807	CG15546	1.1509	2.3197e-07	1.7317e-05			FBgn0052198	CG32198	1.57689	0.001694	0.043106
														FBgn0085284	Blos3	1.13712	6.5849e-05	0.0029658			FBgn0010388	Dro	1.56359	4.0637e-06	0.0002377
														FBgn0031489	CG17224	1.12991	2.2957e-11	3.0712e-09			FBgn0053062	CG33062	1.55779	3.5118e-07	2.524e-05
														FBgn0038581	CG14314	1.12752	7.2585e-10	8.1731e-08			FBgn0002906	Blm	1.55357	3.1609e-14	6.0155e-12
														FBgn0275434	asRNA:CR46266	1.12299	0.0015665	0.040627			FBgn0029167	Hml	1.55318	4.867e-08	4.1102e-06
														FBgn0052557	Mco4	1.11938	0.0010223	0.028717			FBgn0037627	CG13318	1.51185	0.00043499	0.014266
														FBgn0265854	lncRNA:CR44643	1.11058	0.00027269	0.0097566			FBgn0039415	CG6142	1.50828	4.8058e-05	0.0022469
														FBgn0265383	lncRNA:CR44324	1.10948	3.1137e-06	0.00018866			FBgn0050374	CR30374	1.49265	0.0013071	0.035324
														FBgn0265551	lncRNA:CR44401	1.10895	7.742e-05	0.0033745			FBgn0000276	CecA1	1.46819	1.1604e-09	1.2544e-07
														FBgn0264328	asRNA:CR43787	1.10668	4.217e-05	0.0019993			FBgn0001285	Jon44E	1.4641	0.0001293	0.0051691
														FBgn0013342	nSyb	1.10052	0.00022299	0.0082776			FBgn0037889	scpr-A	1.4588	3.7988e-10	4.3871e-08
														FBgn0052201	CG32201	1.09223	5.8413e-07	4.0685e-05			FBgn0037291	CG14662	1.45266	9.9714e-13	1.5487e-10
														FBgn0032433	Oatp33Ea	1.08199	0.00012837	0.0051468			FBgn0265922	lncRNA:CR44711	1.43165	2.196e-06	0.00013866
														FBgn0264567	lncRNA:CR43939	1.07791	2.2851e-08	2.1004e-06			FBgn0038144	CG8870	1.41505	1.4798e-10	1.8514e-08
														FBgn0265064	lncRNA:CR44175	1.07422	0.00039581	0.013173			FBgn0032693	Cyp310a1	1.40964	2.1057e-08	1.9759e-06
														FBgn0000047	Act88F	1.07375	0.0017197	0.043432			FBgn0039777	Jon99Fii	1.40064	0.00094992	0.027022
														FBgn0003499	sr	1.07165	2.7509e-05	0.0013666			FBgn0031701	TotM	1.39914	0.00013352	0.0053062
														FBgn0021800	Reph	1.07122	0.00068379	0.020578			FBgn0036485	FucTA	1.39108	3.3828e-14	6.3483e-12
														FBgn0085249	CG34220	1.07095	0.0013235	0.035553			FBgn0037634	hng2	1.34229	3.5643e-08	3.1072e-06
														FBgn0029681	CG15239	1.06278	0.00096874	0.027499			FBgn0039435	TwdlP	1.34146	2.1935e-09	2.3155e-07
														FBgn0031970	CG7227	1.05102	0.00011906	0.0048601			FBgn0265426	lncRNA:CR44338	1.34082	6.2819e-07	4.3301e-05
														FBgn0036362	CG10725	1.03758	0.00019291	0.0073219			FBgn0036208	CG10361	1.33462	0.00010693	0.004473
														FBgn0030773	CG9676	1.03475	0.00075398	0.022159			FBgn0020633	Mcm7	1.32964	0.00075876	0.022239
														FBgn0036232	CG14125	1.03367	9.3209e-05	0.0039605			FBgn0265424	lncRNA:TS14	1.32734	0.00011629	0.0047617
														FBgn0038678	mRpL55	1.02687	7.1348e-06	0.00040337			FBgn0035921	CG13305	1.32673	7.526e-05	0.0033017
														FBgn0050489	Cyp12d1-p	1.02494	0.0001059	0.0044518			FBgn0259989	CG42486	1.32413	0.00092724	0.026601
														FBgn0035317	Oseg2	1.02066	3.4275e-05	0.0016719			FBgn0041711	yellow-e	1.31819	1.7137e-09	1.8233e-07
																					FBgn0029970	Nek2	1.29735	0.00027914	0.0098995
																					FBgn0283476	Dhc16F	1.29536	1.4224e-08	1.344e-06
																					FBgn0263492	asRNA:CR43481	1.28964	0.00065477	0.020016
																					FBgn0260874	Ir76a	1.28785	1.9534e-07	1.4745e-05
																					FBgn0036495	CG33259	1.25918	5.4503e-08	4.5742e-06
																					FBgn0039591	CG9988	1.25696	0.00055804	0.017414
																					FBgn0039585	CG1894	1.25444	1.3002e-06	8.5697e-05
																					FBgn0039930	CG11077	1.24552	3.4117e-06	0.00020219
																					FBgn0003480	spn-B	1.24199	7.8751e-05	0.0034105
																					FBgn0001228	CG4456	1.24014	3.4824e-12	5.0596e-10
																					FBgn0036848	Naxd	1.22892	7.1734e-10	8.1451e-08
																					FBgn0034331	CG15067	1.20134	7.9925e-05	0.0034503
																					FBgn0052022	CG32022	1.19657	4.7062e-13	7.8506e-11
																					FBgn0259237	CG42335	1.19524	0.0019025	0.046911
																					FBgn0267454	asRNA:CR45804	1.18964	0.0013169	0.035515
																					FBgn0043575	PGRP-SC2	1.18348	0.00019619	0.0074257
																					FBgn0052984	CG32984	1.17436	0.00072664	0.021532
																					FBgn0035211	CG2211	1.16795	2.9572e-09	3.0502e-07
																					FBgn0264518	lncRNA:CR43917	1.16794	0.0012271	0.033769
																					FBgn0001226	Hsp27	1.16604	3.333e-09	3.3861e-07
																					FBgn0260231	CG42505	1.15366	3.1901e-07	2.33e-05
																					FBgn0260230	CG42504	1.15366	3.1788e-07	2.33e-05
																					FBgn0262592	CG43127	1.14874	4.4383e-09	4.4096e-07
																					FBgn0054041	CG34041	1.13132	2.9568e-08	2.6459e-06
																					FBgn0039299	CG11854	1.11999	9.5136e-07	6.3637e-05
																					FBgn0031364	CG17648	1.10997	0.00022586	0.0083383
																					FBgn0051157	CG31157	1.1098	6.7449e-08	5.5234e-06
																					FBgn0262099	CG42852	1.10774	1.689e-05	0.00087108
																					FBgn0052072	Elo68alpha	1.10712	1.2491e-05	0.00066447
																					FBgn0083936	Acp54A1	1.0987	6.4766e-07	4.4002e-05
																					FBgn0029816	CG12729	1.09396	6.4473e-09	6.3588e-07
																					FBgn0038038	Sccpdh2	1.08307	2.2252e-05	0.0011346
																					FBgn0031930	CG7025	1.08256	0.00075436	0.022159
																					FBgn0035358	CG14949	1.07924	1.4795e-05	0.00077187
																					FBgn0037837	CG14693	1.07181	1.2425e-06	8.2699e-05
																					FBgn0267537	lncRNA:CR45877	1.06984	5.7082e-06	0.00032544
																					FBgn0265445	lncRNA:CR44345	1.06693	0.00027294	0.0097566
																					FBgn0036351	CG14107	1.06598	0.0012977	0.03521
																					FBgn0262880	CG43235	1.06147	8.4278e-07	5.6655e-05
																					FBgn0037140	SLC22A	1.05412	0.00012207	0.0049682
																					FBgn0035926	Acbp5	1.05341	0.0013651	0.036239
																					FBgn0036660	CG13025	1.05137	5.3706e-07	3.7815e-05
																					FBgn0265834	CG44623	1.05087	0.00012426	0.0050269
																					FBgn0035918	Cdc6	1.04876	1.3931e-05	0.00073532
																					FBgn0032372	CG4988	1.04438	1.0605e-05	0.00058014
																					FBgn0050429	CG30429	1.03949	5.4176e-07	3.7929e-05
																					FBgn0286075	DNAlig3	1.03938	4.7716e-08	4.055e-06
																					FBgn0030310	PGRP-SA	1.03201	0.00031094	0.010718
																					FBgn0264515	lncRNA:CR43914	1.0301	0.00177	0.044289
																					FBgn0086913	Rab26	1.02991	0.00010464	0.0044323
																					FBgn0037765	CG9458	1.02723	1.8983e-06	0.00012099
																					FBgn0040606	CG6503	1.02722	6.0867e-05	0.0027785
																					FBgn0001149	GstD1	1.00825	1.8679e-07	1.4268e-05
																					FBgn0264470	lncRNA:CR43878	1.00016	0.0010018	0.028201
